# Supplementary material for: Analysis of the genetics of boar taint reveals both single SNPs and regional effects
Source: PubMed Central journal article supplement (PMC4059876; doi:10.1186/1471-2164-15-424), 2014-06-03
Supplement: 12864_2013_6115_MOESM1_ESM.pdf [file 12864_2013_6115_MOESM1_ESM.pdf]

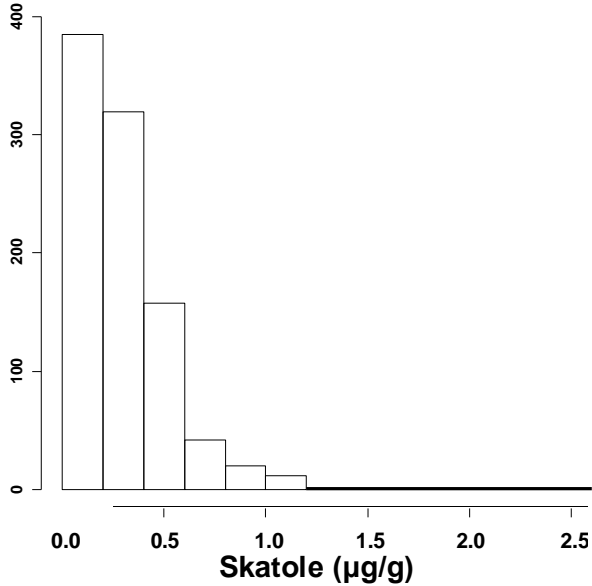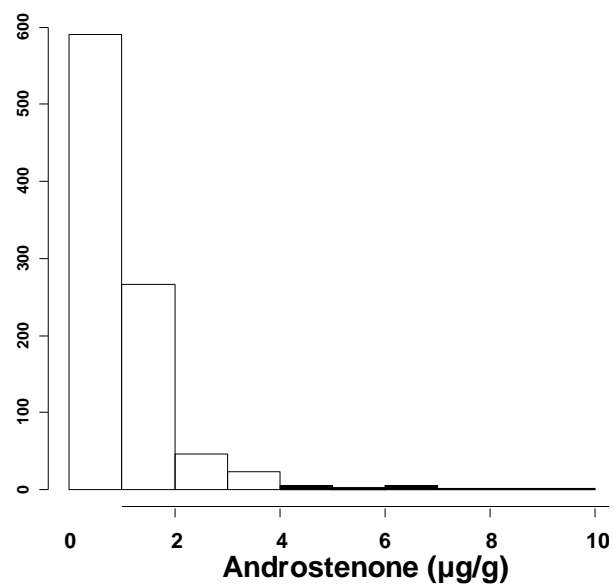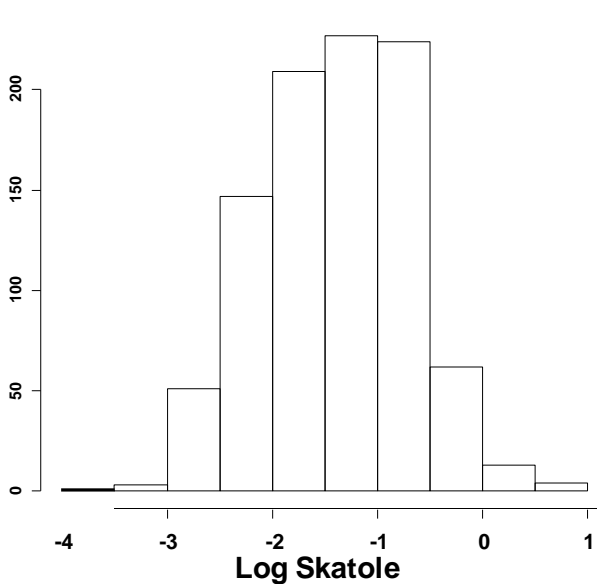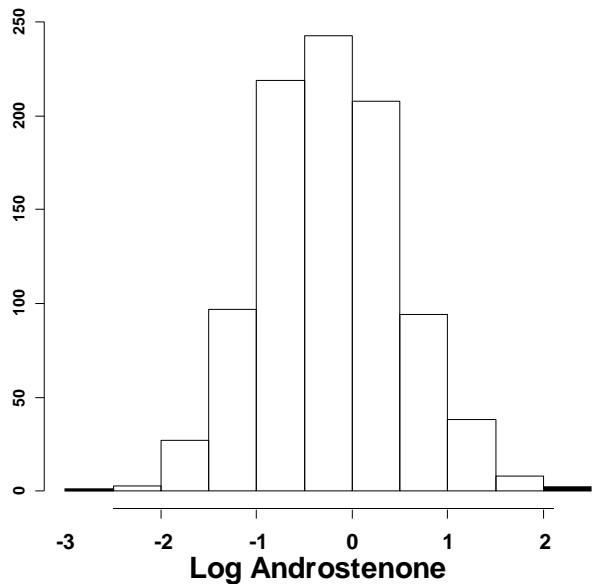

**Supplementary Figure 1** Histograms of skatole (left) and androstenone (right), untransformed (top) and log transformed data (bottom).
