# Supplementary material for: Analysis of the genetics of boar taint reveals both single SNPs and regional effects
Source: PubMed Central journal article supplement (PMC4059876; doi:10.1186/1471-2164-15-424), 2014-06-03
Supplement: 12864_2013_6115_MOESM2_ESM.pdf [file 12864_2013_6115_MOESM2_ESM.pdf]

**Supplementary Table 1:**

Effect of testing structure on estimates and significance of autosomal heritability.

| Chr   | LRT  | p-val    | Androstenone |       |             |       | %herit |
|-------|------|----------|--------------|-------|-------------|-------|--------|
|       |      |          | $h^2_{ind}$  | se    | $h^2_{all}$ | se    |        |
| 1     | 5.3  | 0.0208   | 0.063        | 0.032 | 0.001       | 0.014 | 0.32   |
| 2     | 16.9 | 3.99E-05 | 0.064        | 0.027 | 0.052       | 0.024 | 17.8   |
| 3     | 12.3 | 0.0004   | 0.051        | 0.025 | 0.035       | 0.02  | 12.08  |
| 4     | 7.2  | 0.0072   | 0.042        | 0.023 | 0.013       | 0.015 | 4.58   |
| 5     | 27.3 | 1.78E-07 | 0.087        | 0.03  | 0.068       | 0.026 | 23.23  |
| 6     | 0.02 | 0.8993   | 0.002        | 0.012 | 0           | 0.011 | 0      |
| 7     | 0.2  | 0.639    | 0.008        | 0.016 | 0           | 0.013 | 0      |
| 8     | 0.9  | 0.3297   | 0.017        | 0.018 | 0           | 0.013 | 0      |
| 9     | 2    | 0.1613   | 0.029        | 0.022 | 0.003       | 0.015 | 0.93   |
| 10    | 0.6  | 0.4332   | 0.01         | 0.015 | 0           | 0.011 | 0      |
| 11    | 3.6  | 0.057    | 0.034        | 0.022 | 0.009       | 0.016 | 3.17   |
| 12    | 5.3  | 0.0212   | 0.029        | 0.019 | 0.015       | 0.014 | 5.18   |
| 13    | 22.4 | 2.17E-06 | 0.065        | 0.026 | 0.043       | 0.023 | 14.81  |
| 14    | 3    | 0.0845   | 0.025        | 0.02  | 0.02        | 0.018 | 6.8    |
| 15    | 8.3  | 0.004    | 0.033        | 0.02  | 0.021       | 0.015 | 7.33   |
| 16    | 0.02 | 0.87     | 0.002        | 0.011 | 0           | 0.011 | 0      |
| 17    | 0.9  | 0.3509   | 0.013        | 0.015 | 0           | 0.01  | 0      |
| 18    | 4.8  | 0.0279   | 0.038        | 0.023 | 0.011       | 0.014 | 3.77   |
| Total |      |          | 0.61         |       | 0.292       |       |        |

LRT is the likelihood ratio test of a model fitting a random effect for variance attributed to SNPs from an autosome compared with a null model. Pval is the corresponding p value based on the distribution of the LRT being between  $X^2_1$  and a point mass of zero.  $h^2_{ind}$  is an estimate of the heritability of an autosome where the autosome has been fitted individually in a linear mixed model.  $h^2_{all}$  is an estimate of heritability for an autosome from a model where all 18 autosomes have been fitted simultaneously in a linear mixed model.
